# Supplementary material for: Microplastic exposure disturbs sleep structure, reduces lifespan, and decreases ovary size in Drosophila melanogaster
Source: PubMed Central journal article supplement — Zool Res. 2024 Jul 18;45(4):805–20. doi: 10.24272/j.issn.2095-8137.2024.038 (PMC11298679; doi:10.24272/j.issn.2095-8137.2024.038), 2024-07-18
Supplement: zr-45-805-S1.pdf [file zr-45-805-S1.pdf]

## Supplementary Materials

### **Microplastic exposure disturbs sleep structure, reduces lifespan, and decreases ovary size in *Drosophila melanogaster***

Wei Yan<sup>1,2,#</sup>, Zi-Jie Li<sup>1,#</sup>, Zi-Yi Lin<sup>1,2</sup>, Shu-Qin Ji<sup>1</sup>, William Ka Fai Tse<sup>3</sup>, Zhi-Qiang Meng<sup>1,2,4</sup>, Chang Liu<sup>1,2,\*</sup>, Lei Li<sup>1,2,5,\*</sup>

<sup>1</sup>Shenzhen-Hong Kong Institute of Brain Science, Shenzhen Institute of Advanced Technology, Chinese Academy of Sciences, Shenzhen, Guangdong 518000, China

<sup>2</sup>CAS Key Laboratory of Brain Connectome and Manipulation, the Brain Cognition and Brain Disease Institute, Shenzhen Institute of Advanced Technology, Chinese Academy of Sciences, Shenzhen, Guangdong 518000, China

<sup>3</sup>Laboratory of Developmental Disorders and Toxicology, Center for Promotion of International Education and Research, Faculty of Agriculture, Kyushu University, Fukuoka, Fukuoka 819-0395, Japan

<sup>4</sup>Shenzhen Key Laboratory of Drug Addiction, the Brain Cognition and Brain Disease Institute, Shenzhen Institute of Advanced Technology, Chinese Academy of Sciences, Shenzhen, Guangdong 518000, China

<sup>5</sup>Guangdong Provincial Key Laboratory of Brain Connectome and Behavior, Brain Cognition and Brain Disease Institute, Shenzhen Institute of Advanced Technology, Chinese Academy of Sciences, Shenzhen, Guangdong 518000, China

#Authors contributed equally to this work

\*Corresponding authors, E-mail: chang.liu3@siat.ac.cn; saralilei@siat.ac.cn

Supplementary Table S1. One-Way ANOVA analysis.

| One-Way ANOVA                                                              | Figure        | Test                | DFn, DFd      | F      | P                | Post-hoc Comparison | n1               | n2     | Mean Diff./Mean rank Diff. | Adjusted P-value | Summary |    |
|----------------------------------------------------------------------------|---------------|---------------------|---------------|--------|------------------|---------------------|------------------|--------|----------------------------|------------------|---------|----|
| Quantitative analysis of trypan blue-colored proportion of the gut section | Figure 2C     | One-way ANOVA       | 2,15          | 1.03   | 0.0174           | Control VS 1×MP     | 6                | 7      | -26.4                      | 0.0285           | *       |    |
|                                                                            |               |                     |               |        |                  | Control VS 10×MP    | 6                | 5      | -29.95                     | 0.0224           | *       |    |
| Quantitative analysis of the survival rate at time points                  | Figure 3B     | D 7                 | One-way ANOVA | 2,21   | 2.364            | 0.1186              | Control VS 1×MP  | 8      | 8                          | 10.83            | 0.1947  | ns |
|                                                                            |               |                     |               |        |                  |                     | Control VS 10×MP | 8      | 8                          | 12.5             | 0.1167  | ns |
|                                                                            | D 14          | Kruskal-Wallis test | 3,24          | 5.772  | 0.0558           | Control VS 1×MP     | 8                | 8      | 5                          | 0.3024           | ns      |    |
|                                                                            |               |                     |               |        |                  | Control VS 10×MP    | 8                | 8      | 8.313                      | 0.0341           | *       |    |
|                                                                            | D 21          | One-way ANOVA       | 2,21          | 4.286  | 0.0275           | Control VS 1×MP     | 8                | 8      | 9.583                      | 0.1862           | ns      |    |
|                                                                            |               |                     |               |        |                  | Control VS 10×MP    | 8                | 8      | 15.83                      | 0.0169           | *       |    |
| Quantitative analysis of changes in max episode length                     | Figure 4C     | LP                  | One-way ANOVA | 2,118  | 3.953            | 0.0218              | Control VS 1×MP  | 37     | 41                         | -102.2           | 0.0133  | *  |
|                                                                            |               |                     |               |        |                  |                     | Control VS 10×MP | 37     | 43                         | -37.5            | 0.6145  | ns |
|                                                                            | DP            | Kruskal-Wallis test | 3,121         | 2.845  | 0.2411           | Control VS 1×MP     | 37               | 41     | 9.253                      | 0.4892           | ns      |    |
|                                                                            |               |                     |               |        |                  | Control VS 10×MP    | 37               | 43     | -3.271                     | >0.9999          | ns      |    |
| Ovary size evaluation                                                      | Figure 6D     | 0 Week              | One-way ANOVA | 2,33   | 7.769            | 0.0017              | Control VS 1×MP  | 12     | 12                         | -13 752          | 0.0587  | ns |
|                                                                            |               |                     |               |        |                  |                     | Control VS 10×MP | 12     | 12                         | 9 944            | 0.2181  | ns |
|                                                                            | 1 Week        | One-way ANOVA       | 2,30          | 11.57  | 0.0002           | Control VS 1×MP     | 10               | 11     | 49 389                     | 0.0014           | **      |    |
|                                                                            |               |                     |               |        |                  | Control VS 10×MP    | 10               | 12     | 58 088                     | 0.0002           | ***     |    |
|                                                                            | 2 Week        | Kruskal-Wallis test | 3,34          | 6.628  | 0.0364           | Control VS 1×MP     | 10               | 12     | 6.617                      | 0.2414           | ns      |    |
|                                                                            |               |                     |               |        |                  | Control VS 10×MP    | 10               | 12     | 10.95                      | 0.0205           | *       |    |
|                                                                            | 3 Week        | One-way ANOVA       | 2,33          | 4.98   | 0.0129           | Control VS 1×MP     | 12               | 12     | 34 420                     | 0.009            | **      |    |
|                                                                            |               |                     |               |        |                  | Control VS 10×MP    | 12               | 12     | 9 239                      | 0.838            | ns      |    |
| 4 Week                                                                     | One-way ANOVA | 2,33                | 8.32          | 0.0012 | Control VS 1×MP  | 12                  | 12               | 37 217 | 0.0005                     | ***              |         |    |
|                                                                            |               |                     |               |        | Control VS 10×MP | 12                  | 12               | 17 351 | 0.1323                     | ns               |         |    |
| Female fecundity assay on fertilization ability or reproductive capacity   | Figure 7C, D  | Virgin flies        | One-way ANOVA | 2,45   | 1.233            | 0.301               | Control VS 1×MP  | 16     | 16                         | 5.454            | 0.269   | ns |
|                                                                            |               |                     |               |        |                  |                     | Control VS 10×MP | 16     | 16                         | 3.901            | 0.563   | ns |
|                                                                            | Mated flies   | One-way ANOVA       | 2,45          | 0.9201 | 0.4058           | Control VS 1×MP     | 16               | 16     | -6.381                     | 0.4055           | ns      |    |
|                                                                            |               |                     |               |        |                  | Control VS 10×MP    | 16               | 16     | -4.95                      | 0.6427           | ns      |    |

## Supplementary Table S2. T-test analysis.

| T test                                                   |           | Test            | Df                     | T/U | P-value      | Summary |    |
|----------------------------------------------------------|-----------|-----------------|------------------------|-----|--------------|---------|----|
| Female fecundity assay during the development experiment | Figure 7B |                 |                        |     |              |         |    |
|                                                          | D 1       | Control VS 1×MP | Unpaired <i>t</i> test | 10  | $T=0.005525$ | 0.9957  | ns |
|                                                          | D 2       | Control VS 1×MP | Mann Whitney test      | –   | $U=17$       | 0.9372  | ns |
|                                                          | D 3       | Control VS 1×MP | Unpaired <i>t</i> test | 10  | $T=1.650$    | 0.13    | ns |
|                                                          | D 4       | Control VS 1×MP | Unpaired <i>t</i> test | 10  | $T=1.639$    | 0.1322  | ns |
|                                                          | D 5       | Control VS 1×MP | Unpaired <i>t</i> test | 10  | $T=0.5304$   | 0.6074  | ns |
|                                                          | D 6       | Control VS 1×MP | Unpaired <i>t</i> test | 10  | $T=0.3132$   | 0.7606  | ns |

–: Not available
